# Supplementary material
Source: PubMed Central journal article supplement (PMC5959001)
Supplement: NIHMS77754-supplement-online_supplement.pdf [file NIHMS77754-supplement-online_supplement.pdf]

# Supporting information

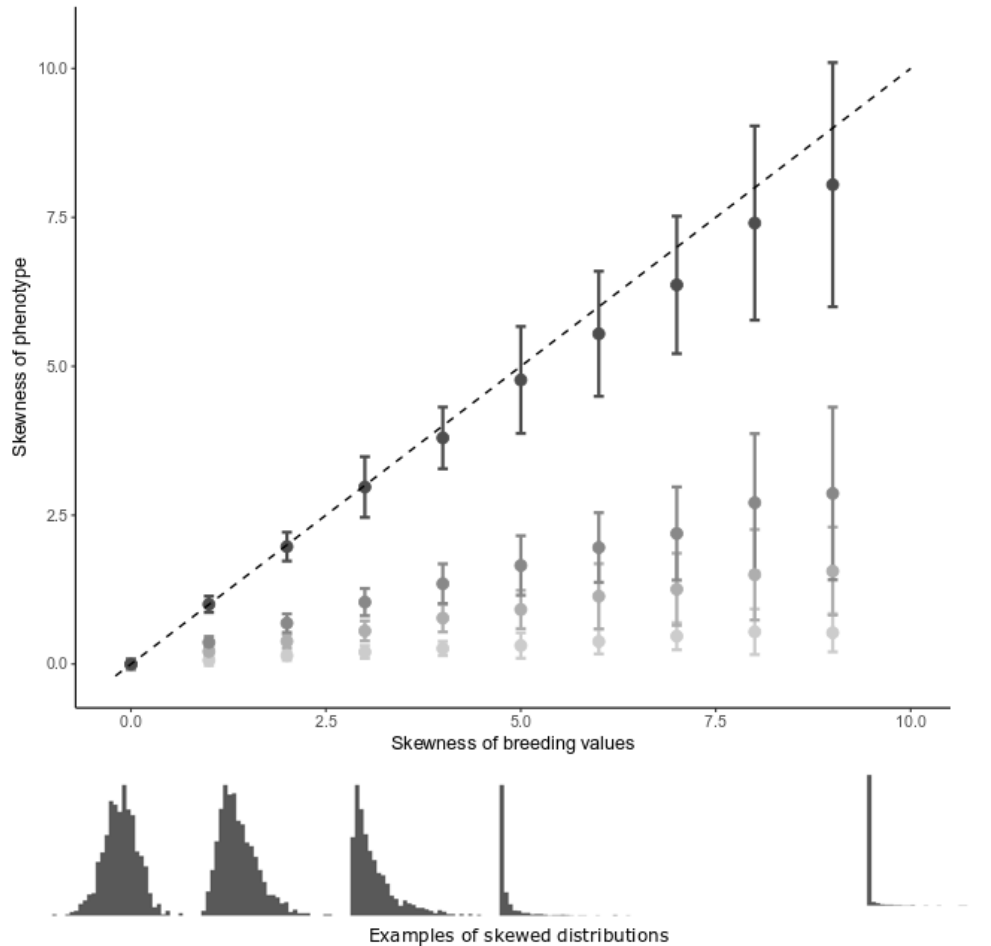

3

4 Figure S1 – Skewness in phenotypic distribution against skewness in breeding values. Mean  
5 estimations of skewness and their standard errors in simulations (1000 individuals) are shown  
6 for variable heritabilities ( $h^2 = 1; \frac{1}{2}; \frac{1}{3}$  or  $\frac{1}{6}$  from black to light grey respectively). The dotted  
7 lines plots  $y = x$ . Typical distributions with skewness  $\alpha = 0, 1, 2, 5$  and  $10$ , are illustrated  
8 below the graph. Note that confidence intervals increase with expected skewness (parameter  
9 of the Gamma distribution). This is because realized skewness becomes more variable when

- 10 samples are drawn from distributions with higher expected skewness, as a result of the
- 11 increased probability to not pick values at the right tail of the distribution.

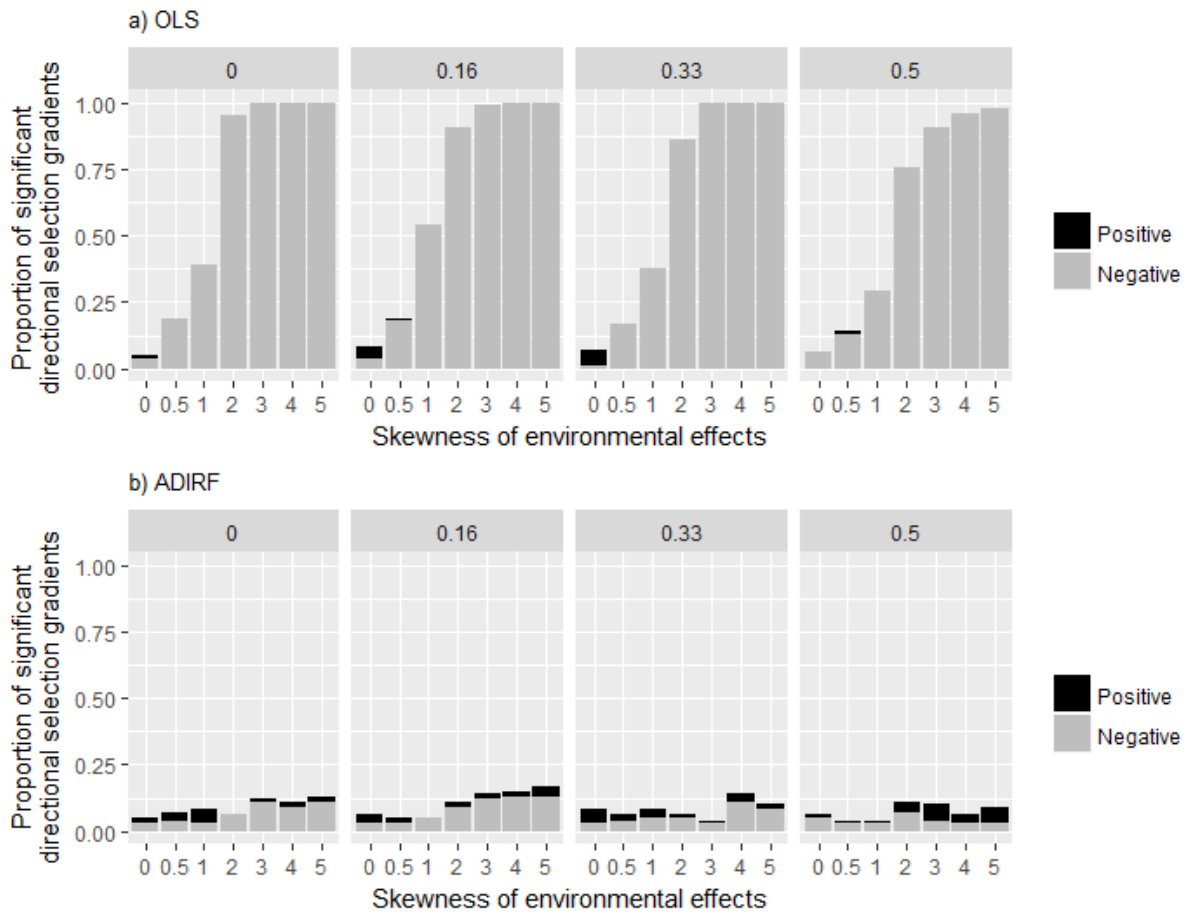

12

13 Figure S2 – Power to detect directional selection gradients under skewed environmental effects.

14 The proportions of simulations where a significant selection gradient was estimated by the OLS

15 method (a) or the ADIRF method (b) are shown for several combinations of skewness of

16 environmental effects and heritability. In black, positive selection gradients; in grey, negative

17 selection gradient. At the top of each frame, values of heritability:  $h^2 = 0, \frac{1}{6}, \frac{1}{3}$  or  $\frac{1}{2}$ . Significance

18 of selection gradients from zero is determined by a Student test at 5% (a) or a permutation test

19 1000 permutations) (b).

20

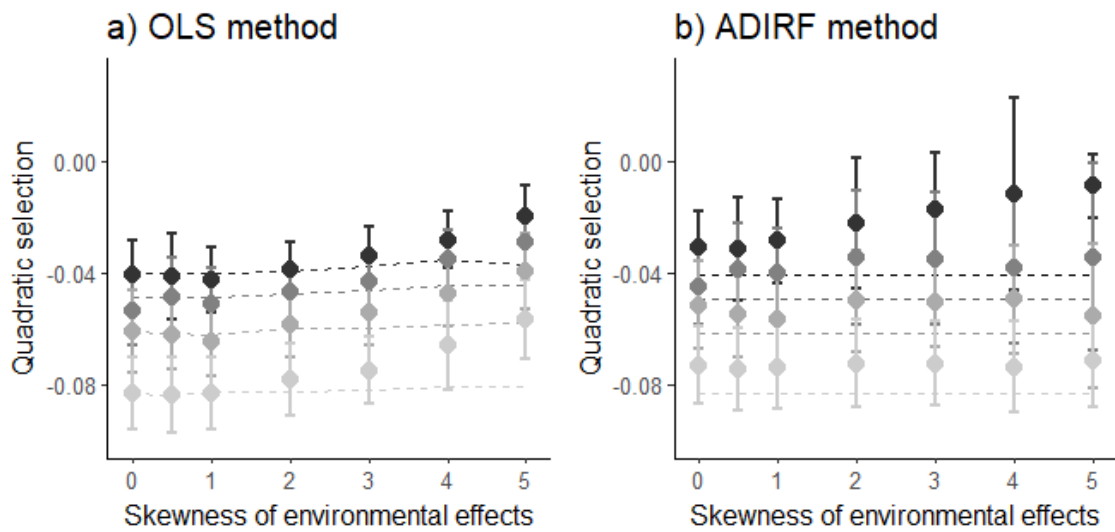

22

23 Figure S3 – Estimated quadratic selection gradients with skewed environmental effects.  
 24 Standardized quadratic selection gradient (mean  $\pm$  se) estimated by the OLS method (a) or the  
 25 ADIRF method (b), are represented against the skewness of environmental effects, for variable  
 26 heritabilities ( $h^2 = \frac{1}{2}; \frac{1}{3}; \frac{1}{6}$  or  $0$  from black to light grey). Dotted lines show predictions from  
 27 the model, using  $\hat{\gamma} = \partial^2 \ln(\bar{W}) / \partial \bar{z}^2 + \beta^2$  (Lande and Arnold (1983)) and the eq. (13) or eq.  
 28 6-7 for (a) and (b) respectively (see Table 2).

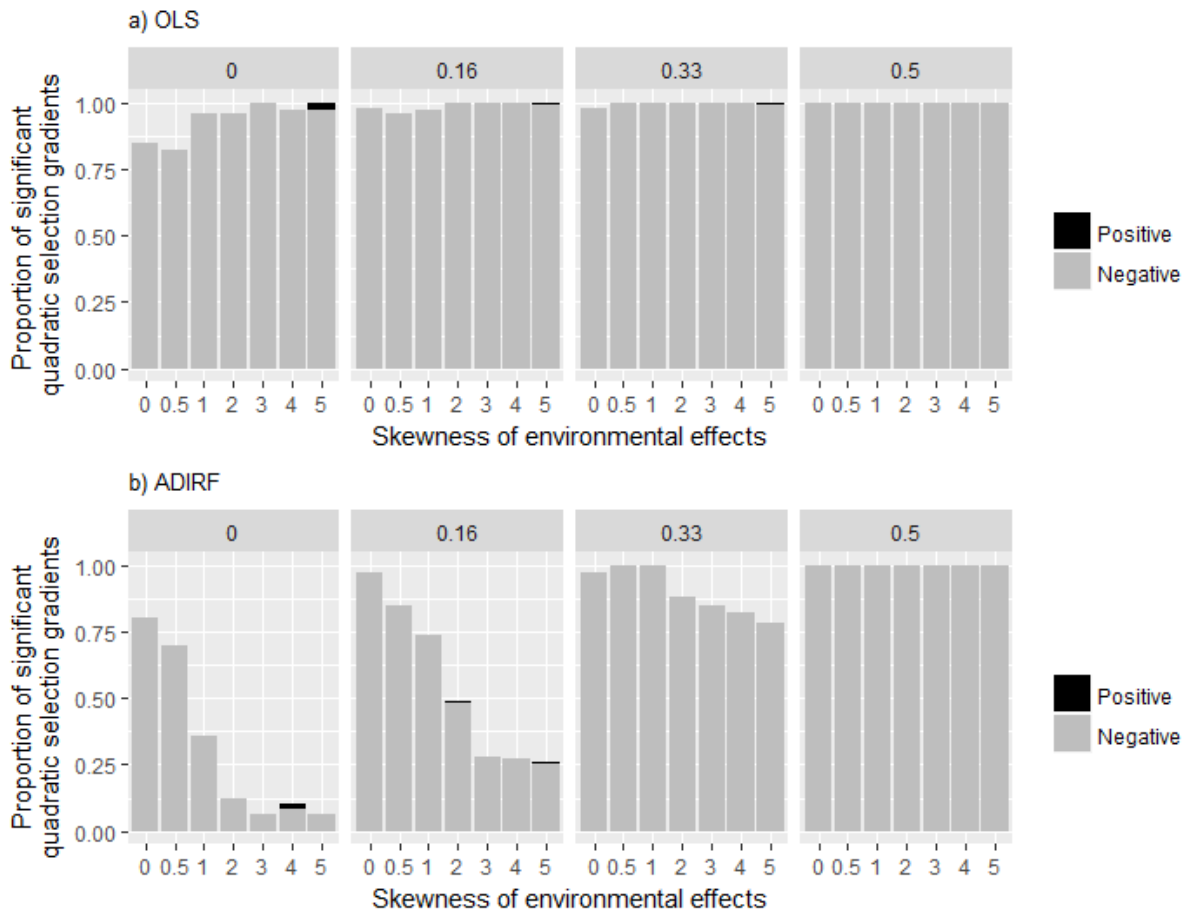

29

30 Figure S4 – Power to detect quadratic selection gradient under skewed environmental effects.

31 The proportions of simulations where a significant selection gradients was estimated by the

32 OLS method (a) or the ADIRF method (b) are shown for several combinations of skewness of

33 environmental effects and heritability. In black, positive selection gradients; in grey, negative

34 selection gradient. At the top of each frame, values of heritability:  $h^2 = 0, \frac{1}{6}, \frac{1}{3}$  or  $\frac{1}{2}$ . Significance

35 of selection gradients from zero is determined by a Student test at 5% (a) or a permutation test

36 (1000 permutations) (b).

37

38

39

40

41

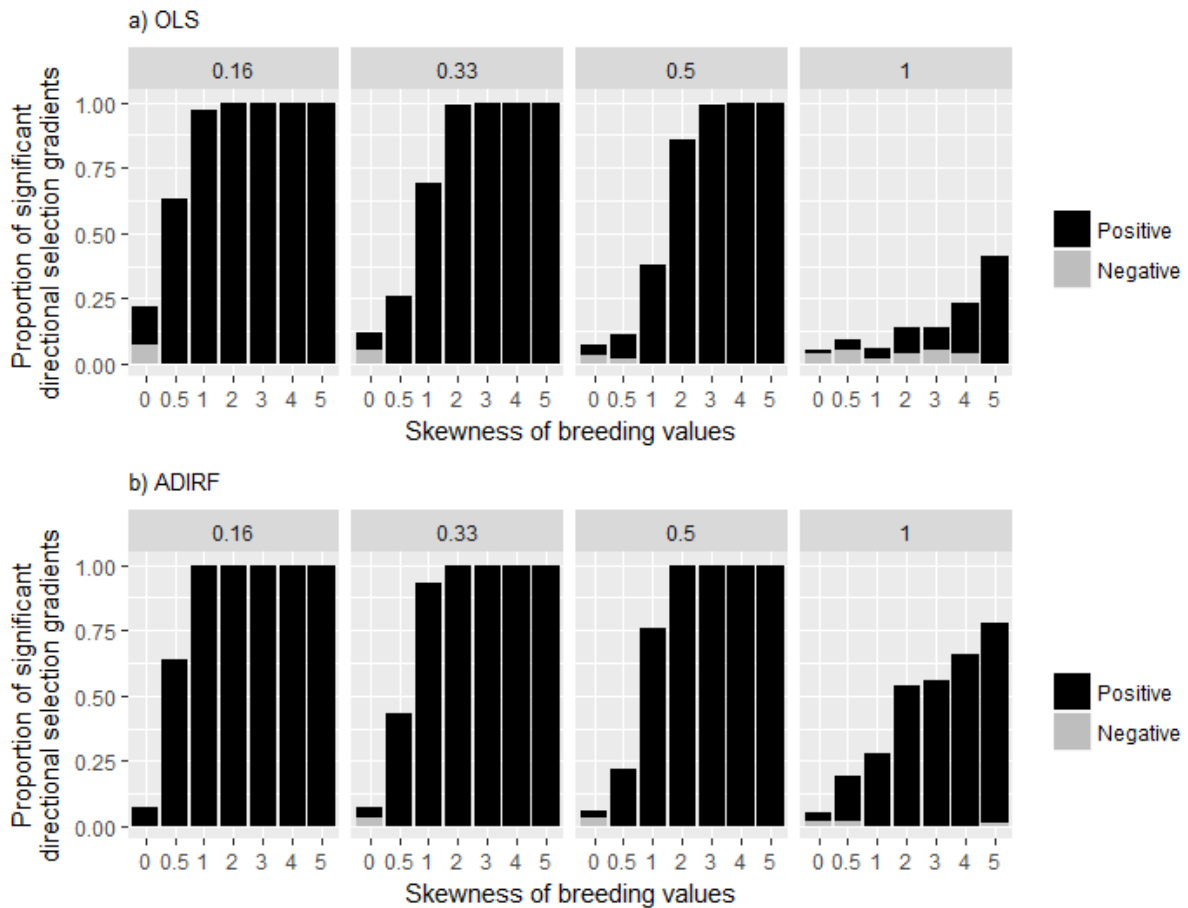

42

43 Figure S5 – Power to detect directional selection gradient under skewed breeding values. The  
 44 proportions of simulations where a significant selection gradient was estimated by the OLS  
 45 method (a) or the ADIRF method (b) are shown for several combinations of skewness of  
 46 breeding values and heritability. In black, positive selection gradients; in grey, negative  
 47 selection gradient. At the top of each frame, values of heritability:  $h^2 = \frac{1}{6}, \frac{1}{3}, \frac{1}{2}$  or 1. Significance  
 48 of selection gradients from zero is determined by a student test at 5% (a) or a permutation test  
 49 (1000 permutations) (b).

50

51

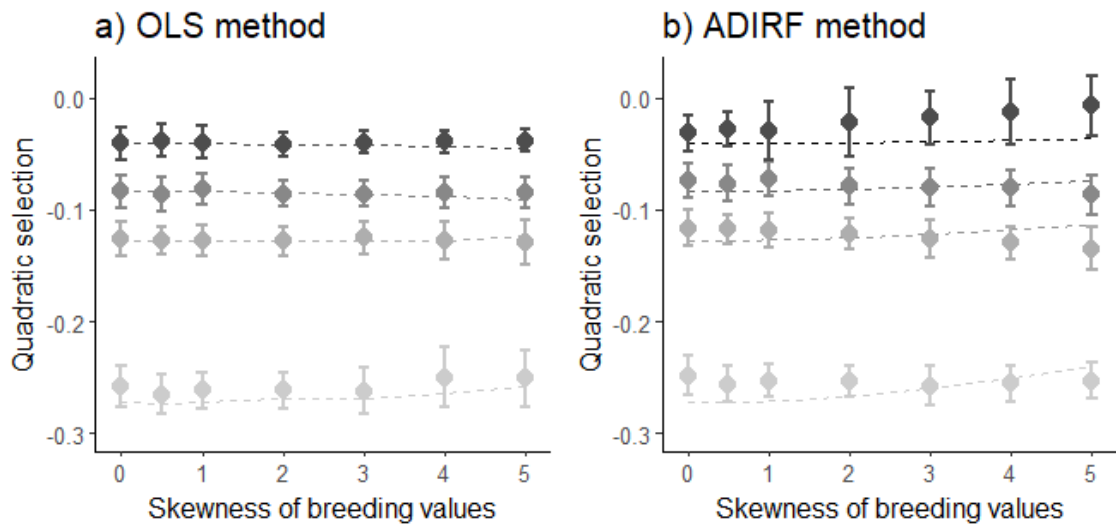

52

53 Figure S6 – Estimated quadratic selection gradients with skewed genetic effects. Standardized  
 54 quadratic selection gradient (mean  $\pm$  se) estimated by the OLS method (a) or the ADIRF method  
 55 (b), are represented against the skewness of breeding values, for variable heritabilities ( $h^2 =$   
 56  $1; \frac{1}{2}; \frac{1}{3}$  or  $\frac{1}{6}$  from black to light grey). Dotted lines show predictions from the model, using  $\hat{\gamma} =$   
 57  $\partial^2 \ln(\bar{W}) / \partial \bar{z}^2 + \beta^2$  (Lande and Arnold (1983)) and the eq. (13) or eq. 6-7 for (a) and (b)  
 58 respectively (see Table 2).

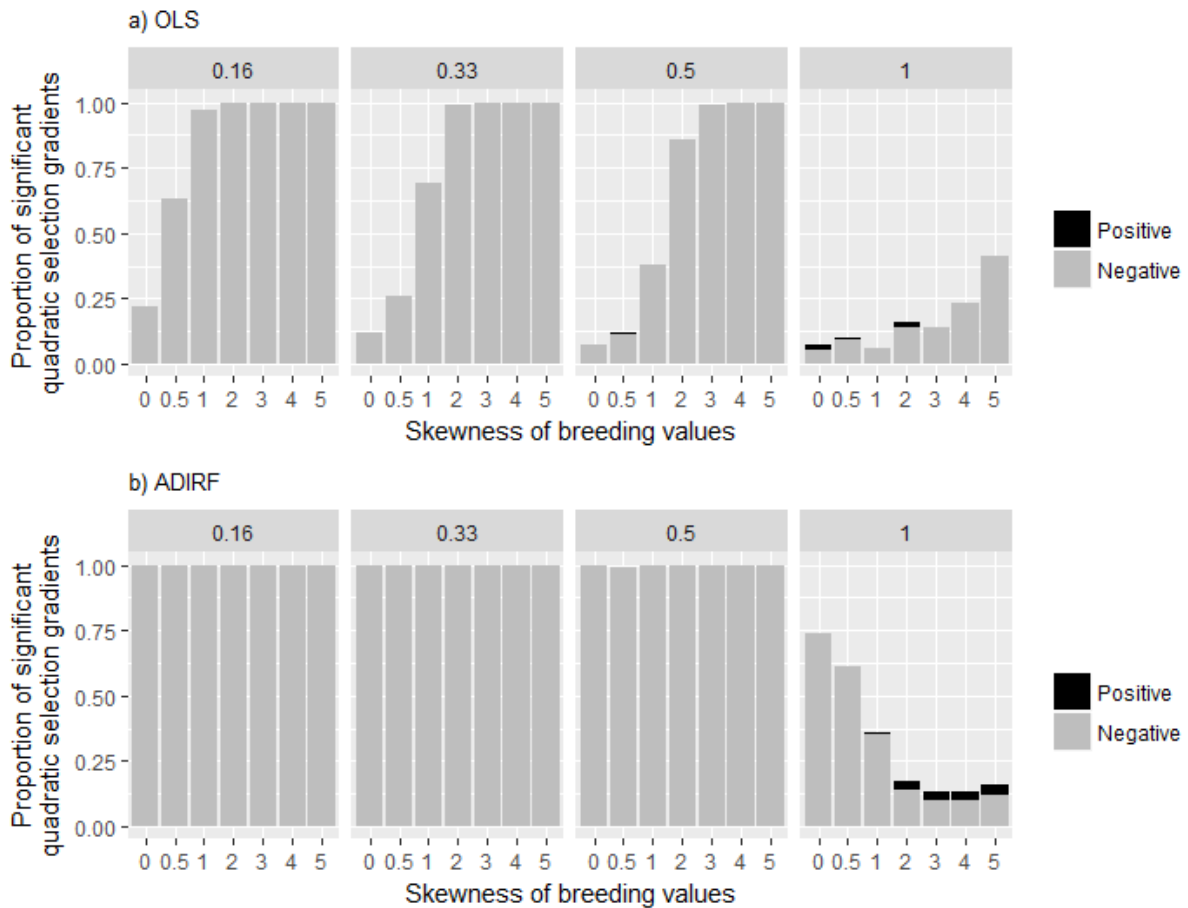

59

60 Figure S7 – Power to detect quadratic selection gradients under skewed breeding values. The  
 61 proportions of simulations where a significant selection gradient was estimated by the OLS  
 62 method (a) or the ADIRF method (b) are shown for several combinations of skewness of  
 63 breeding values and heritability. In black, positive selection gradients; in grey, negative  
 64 selection gradient. At the top of each frame, values of heritability:  $h^2 = \frac{1}{6}, \frac{1}{3}, \frac{1}{2}$  or 1.  
 65 Significance of selection gradients from zero is determined by a Student test at 5% (a) or a  
 66 permutation test (1000 permutations) (b).
